# Supplementary figures and images for: Influence of Human Jaw Periosteal Cells Seeded β-Tricalcium Phosphate Scaffolds on Blood Coagulation
Source: MDPI journal article supplement (doi:10.3390/ijms22189942), 2021-09-14

## Supplementary Data

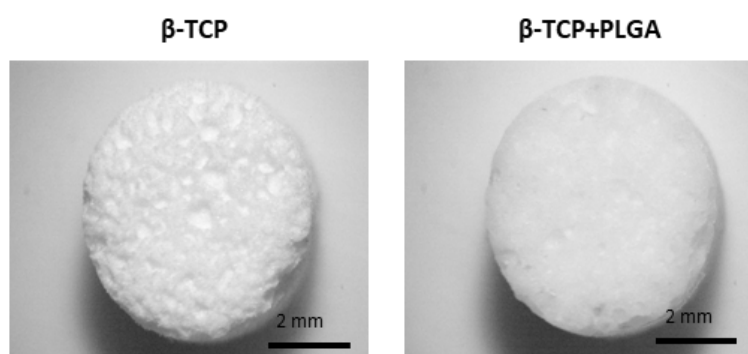

**Figure S1.** Overview images of uncoated and PLGA-coated  $\beta$ -TCP scaffolds.

Supplement: s1 [file s1]
